# Supplementary material for: Direct determination of fluorine in high-purity water samples using vacuum sample chamber total reflection X-ray fluorescence spectrometry
Source: Royal Society of Chemistry journal article supplement (doi:10.1039/c7ja00377c), 2018-01-01
Supplement: c7ja00377c1.pdf [file c7ja00377c1.pdf]

### Supplementary documents

#### Direct determination of fluorine in high purity water samples using vacuum sample chamber TXRF spectrometry

Kaushik Sanyal<sup>1, 2</sup> and N.L. Misra<sup>1, 2, \*</sup>

<sup>1</sup> Fuel Chemistry Division, Bhabha Atomic Research Centre, Mumbai 400085, India

<sup>2</sup> Homi Bhabha National Institute, Mumbai, 400094,

\*: Corresponding author, email: [nlmisra@barc.gov.in](mailto:nlmisra@barc.gov.in), [nlmisra@yahoo.com](mailto:nlmisra@yahoo.com)

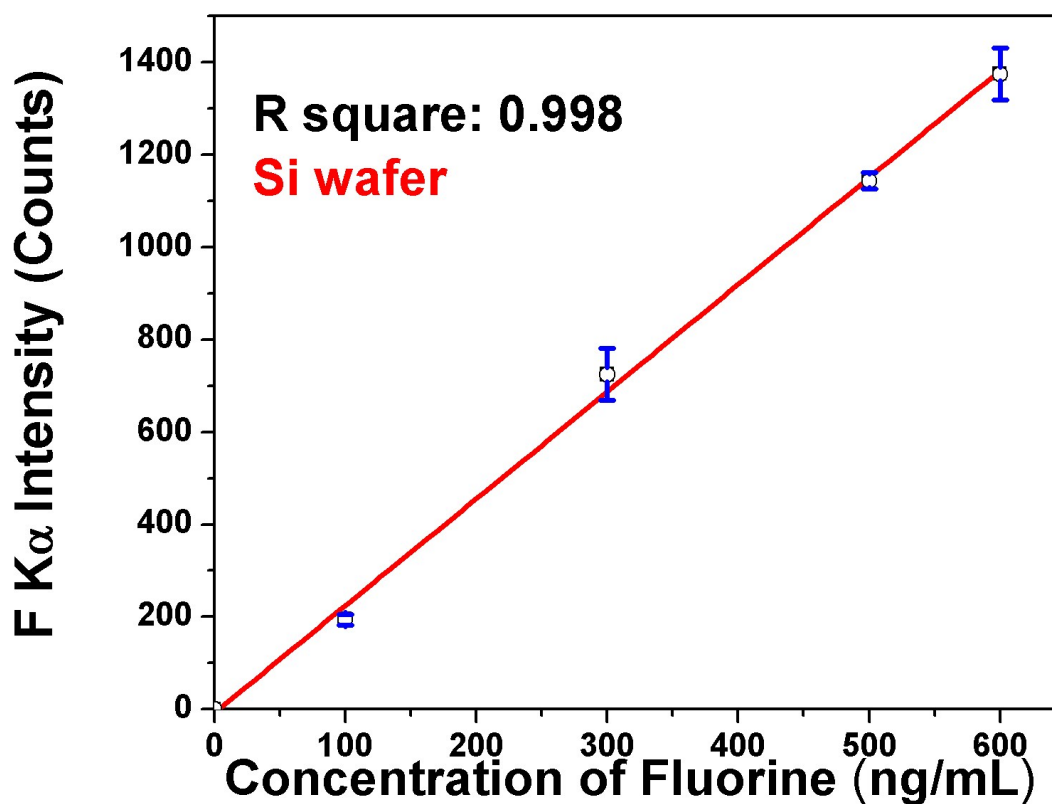

**Figure S1:** Calibration plot obtained for the TXRF determination of F in water samples with F concentration in the range of 100-600 ng/mL. The samples were deposited on Si wafer supports
